# Supplementary material for: Methanol as an anti-solvent to improve the low open-circuit voltage of CsPbBr3 perovskite solar cells prepared with water
Source: Royal Society of Chemistry journal article supplement (doi:10.1039/d3dt04192a), 2024-01-01
Supplement: d3dt04192a1.pdf [file d3dt04192a1.pdf]

## Supporting information—Methanol as anti-solvent to improve the low open-circuit voltage of CsPbBr<sub>3</sub> perovskite solar cells prepared with water

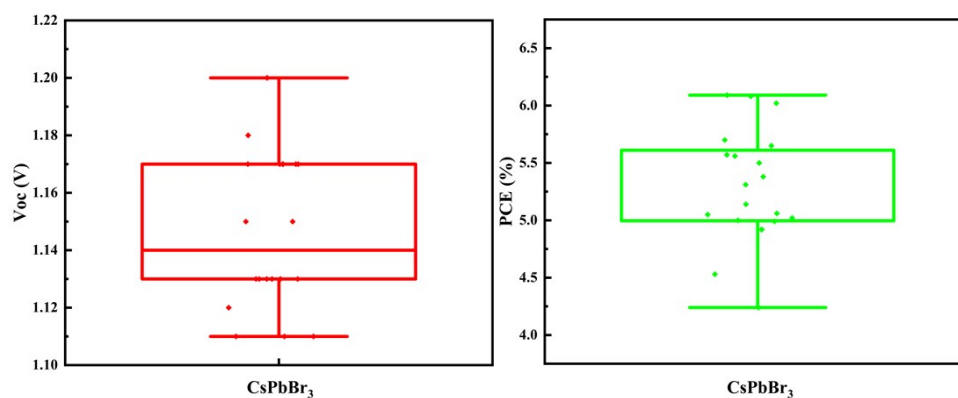

**Figure S1.** The Voc and PCE box chart of CsPbBr<sub>3</sub> device obtained by CsBr/H<sub>2</sub>O solution.

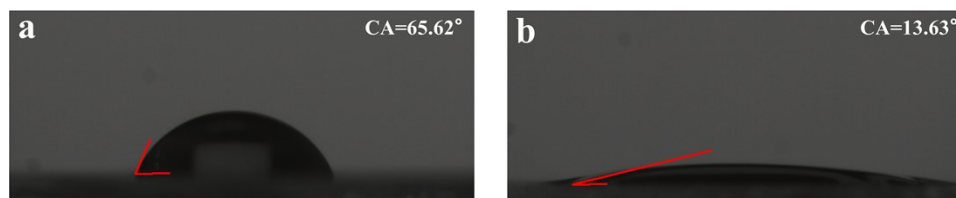

**Figure S2.** The contact angle image of (a) PbBr<sub>2</sub> layer to CsBr/H<sub>2</sub>O solution and (b) PbBr<sub>2</sub> layer added with 2-Hydroxyethylurea to CsBr/H<sub>2</sub>O solution.

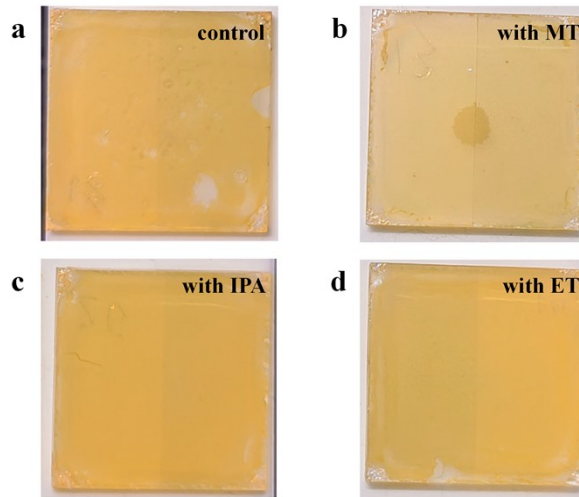

**Figure S3.** The CsPbBr<sub>3</sub> film prepared with CsBr/H<sub>2</sub>O solution treated (a) without and with (b) MT, (c) IPA, and (d) ET.

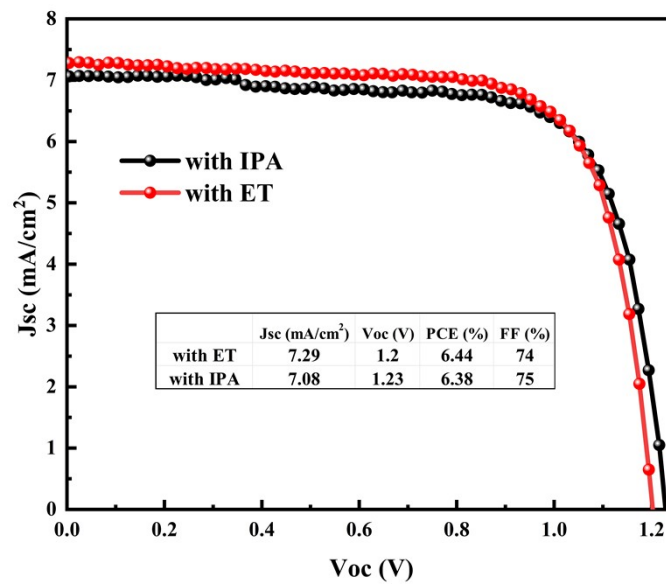

**Figure S4.** The J-V curve of CsPbBr<sub>3</sub> PSCs treated with IPA and ET.

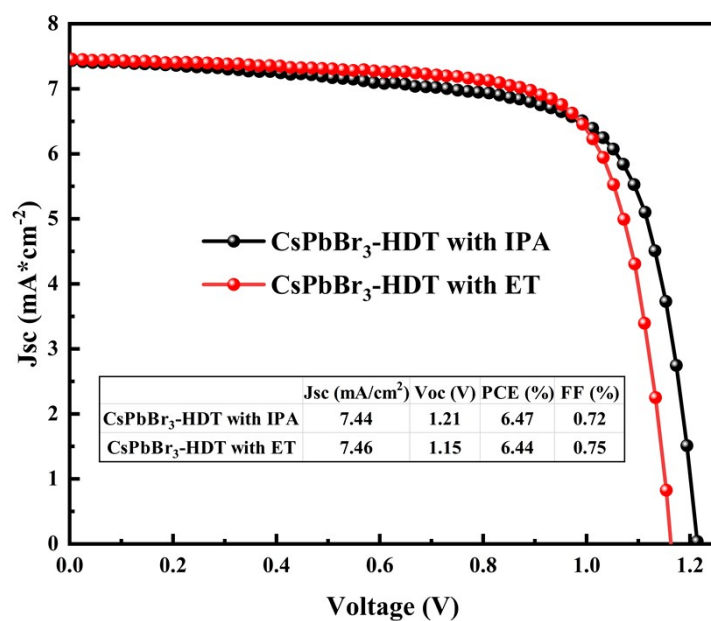

Figure S5. The J-V curve of CsPbBr<sub>3</sub> PSCs contained 2-Hydroxyethylurea treated with IPA and ET.

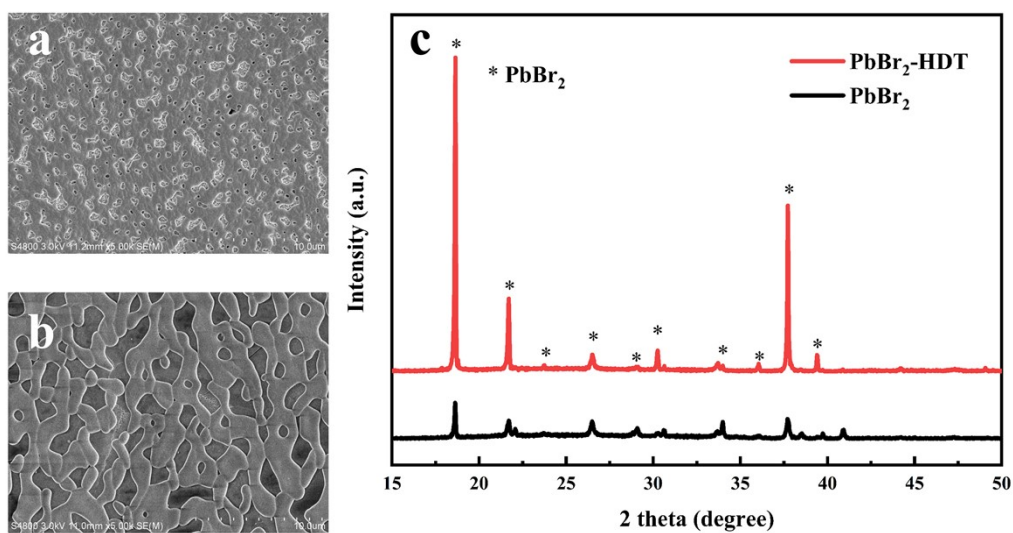

Figure S6. SEM spectra of (a) PbBr<sub>2</sub> layer and (b) PbBr<sub>2</sub> layer contained 2-Hydroxyethylurea; (c) XRD image of PbBr<sub>2</sub> layer and PbBr<sub>2</sub> layer contained 2-Hydroxyethylurea.

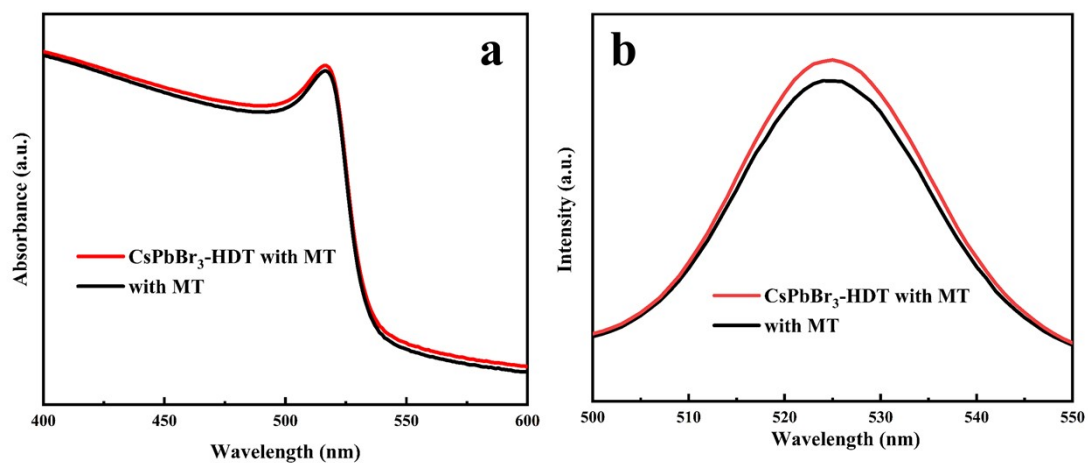

**Figure S7.** (a) UV-vis, (b) PL spectra of methanol anti-solvent treated CsPbBr<sub>3</sub> films obtained from the PbBr<sub>2</sub> layers with and without 2-Hydroxyethylurea.

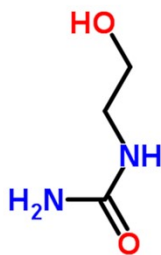

**Figure S8.** The structural formula of 2-Hydroxyethylurea.

**Table S1.** The coefficient of TRPL double exponential function fitting curve.

| perovskite film | A <sub>1</sub> (%) | A <sub>2</sub> (%) | τ <sub>1</sub> (ns) | τ <sub>2</sub> (ns) |
|-----------------|--------------------|--------------------|---------------------|---------------------|
| Control         | 89.47              | 10.53              | 0.66856             | 7.3879              |
| With MT         | 67.17              | 32.83              | 0.59518             | 8.64355             |
